# Supplementary material
Source: PubMed Central journal article supplement (PMC6628835)
Supplement: pnas.1821312116.sapp.pdf [file pnas.1821312116.sapp.pdf]

## Supporting Information Appendix

### Materials and Methods

#### *Study site*

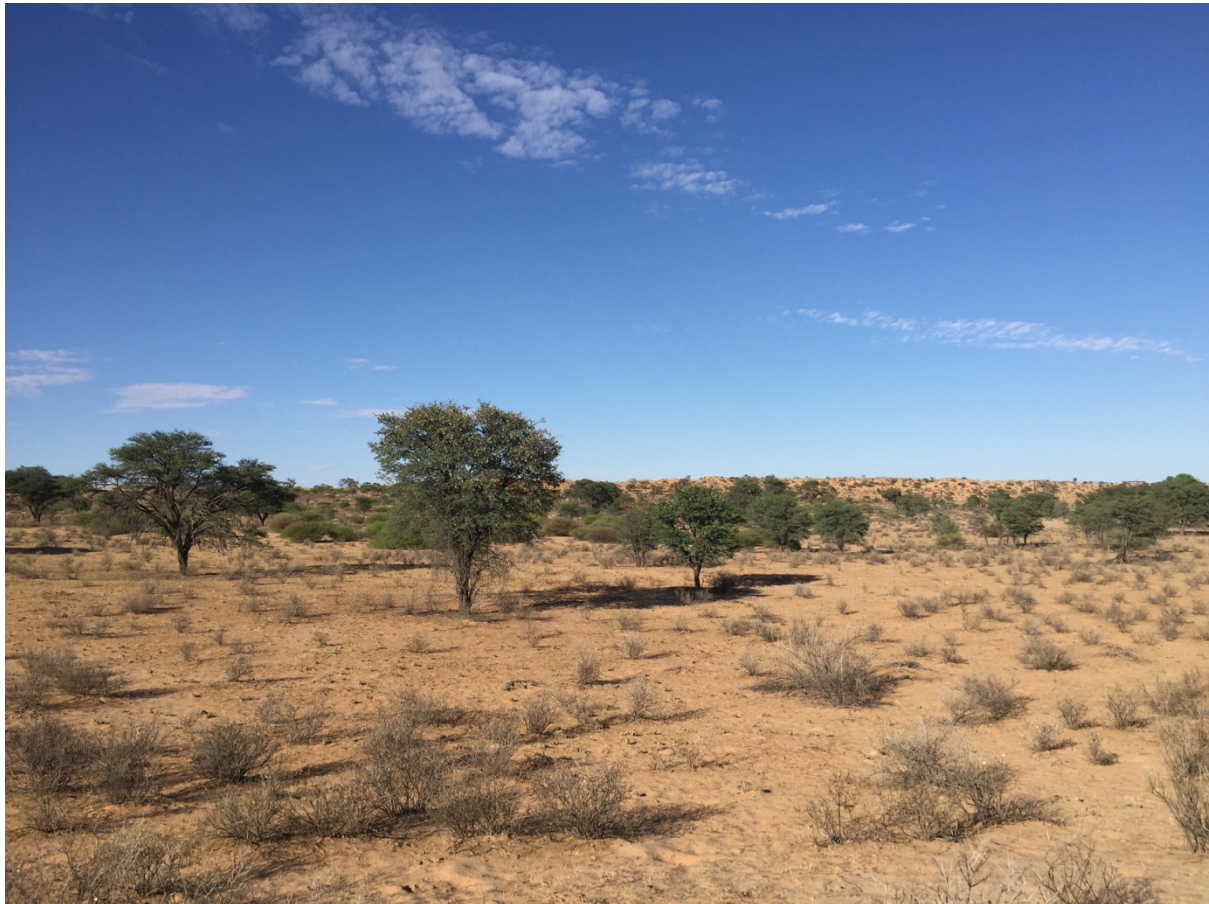

Figure S1. Typical Kalahari arid savanna

#### *Acute exposure during extreme heat events*

In brief, these measurements were made using open flow-through respirometry following the protocol described by Whitfield et al. (2015) (3). The protocol involves exposing birds to stepped increments in  $T_a$  from thermoneutral values where EWL is minimal and  $T_b$  is normothermic up to the maximum  $T_a$  each species can tolerate under conditions of very low humidity achieved by using high flow rates through respirometry chambers (3). Measurements were terminated when a bird was either a) obviously stressed (agitated jumping, pecking, wing flapping or any other escape behaviour) or b) showed signs of the onset of pathological hyperthermia such as loss of balance, coordination or dramatic decrease in EWL and/ or uncontrolled increase in  $T_b$  to  $> 45^\circ\text{C}$ . In the latter scenario, an individual bird was considered to have reached its thermal endpoint, the  $T_a$  associated with the onset

of pathological hyperthermia (3). All the studies from which we obtained data involved the same stepped heat exposure protocol and experimental conditions (4-7).

Table S1. Parameters used for modelling acute heat stress risk in desert birds. Body masses, heat tolerance limits (HTL; the highest tolerable air temperature under laboratory conditions) and the relationship between evaporative water loss (EWL) and air temperature ( $T_a$ ) were obtained from the sources listed. Estimates of EWL as a function of  $T_a$  refer to whole-animal values in  $\text{g H}_2\text{O hr}^{-1}$ , except where asterisks indicate mass-specific values ( $\text{mg H}_2\text{O g}^{-1} \text{hr}^{-1}$ ); these relationships were used to calculate cumulative EWL from daily  $T_a$  traces. Also shown are the maximum daily air temperature ( $T_{\text{max}}$ ) associated with moderate risk of lethal dehydration; these were calculated by modelling EWL during the course of a hot day. For the latter calculations, we generated an average daily  $T_a$  profile using data from the hottest day in each year between 2000 and 2010.

| Species                                                                      | Mass (g) | EWL<br>$\sim T_a$                                               | Dehydration<br>$T_{\text{max}} (^{\circ}\text{C})$ | HTL<br>$(^{\circ}\text{C})$ | Source |
|------------------------------------------------------------------------------|----------|-----------------------------------------------------------------|----------------------------------------------------|-----------------------------|--------|
| Namaqua Dove<br>( <i>Oena capensis</i> )                                     | 40       | $0.096T_a - 3.629$                                              | 49                                                 | 60                          | (5)    |
| Laughing Dove<br>( <i>Spilopelia senegalensis</i> )                          | 100      | $0.181T_a - 6.797$                                              | 52                                                 | 58                          | (5)    |
| Ring-necked Dove<br>(= Cape Turtle Dove)<br>( <i>Streptopelia capicola</i> ) | 153      | $0.235T_a - 8.544$                                              | 52                                                 | 56                          | (5)    |
| Burchell's Sandgrouse<br>( <i>Pterocles burchelli</i> )                      | 193      | $0.445T_a - 17.76$                                              | 51                                                 | 50                          | (4)    |
| Rufous-checked Nightjar<br>( <i>Caprimulgus rufigena</i> )                   | 53       | $0.12T_a - 4.600$                                               | 54                                                 |                             | (7)    |
| African Cuckoo<br>( <i>Cuculus gularis</i> )                                 | 110      | $0.238T_a - 8.930$                                              | 50                                                 | 50                          | (6)    |
| Lilac-breasted Roller<br>( <i>Coracias caudatus</i> )                        | 95       | $0.039T_a - 0.414^{\text{a}}$<br>$0.337T_a - 13.739^{\text{b}}$ | 49                                                 | 53                          | (6)    |
| Burchell's Starling<br>( <i>Lamprotornis australis</i> )                     | 109      | $0.231T_a - 7.110$                                              | 43                                                 | 49                          | (6)    |
| Scaly-feathered Weaver<br>( <i>Sporopipes squamifrons</i> )                  | 10       | $*4.52T_a - 172$                                                | 44                                                 | 48                          | (3)    |

|                                                                  |    |                  |    |    |     |
|------------------------------------------------------------------|----|------------------|----|----|-----|
| Sociable Weaver<br>( <i>Philetairus socius</i> )                 | 25 | $*5.05T_a - 200$ | 45 | 52 | (3) |
| White-browed Sparrow-<br>weaver<br>( <i>Plocepasser mahali</i> ) | 40 | $*4.02T_a - 151$ | 45 | 54 | (3) |

---

\*Mass-specific evaporative water loss values

<sup>a</sup>Evaporative water loss at  $25\text{ }^{\circ}\text{C} < T_a < 44.7\text{ }^{\circ}\text{C}$ . Lilac-breasted rollers showed two significant inflection points in the EWL versus air temperature relationship, with an upper inflection at  $44.7\text{ }^{\circ}\text{C}$ .

<sup>b</sup> $T_a > 44.7\text{ }^{\circ}\text{C}$

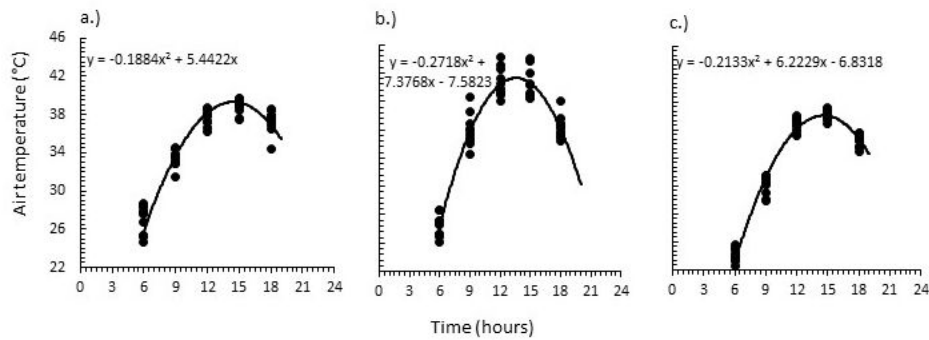

Figure S2. Three-hourly air temperature data from the hottest day of each year between 2000 and 2010 over three regions across southern Africa (a: southern Kalahari Desert, b: central Namibia and c: northern Botswana). A polynomial regression model was fitted to the data from 06:00 to 18:00.

Table S2. Processes, patterns and threshold air temperatures for chronic, sublethal fitness costs of exposure to sustained hot weather in three southern African bird species. Variables driving the changes in breeding success and body condition are indicated in bold.

| Species                                                      | Process and reference                                                                                                                        | Consequence                                           |                                                                     | Threshold                                                      | Significance of $T_{\max} > \text{threshold}$                                                                                                                           |
|--------------------------------------------------------------|----------------------------------------------------------------------------------------------------------------------------------------------|-------------------------------------------------------|---------------------------------------------------------------------|----------------------------------------------------------------|-------------------------------------------------------------------------------------------------------------------------------------------------------------------------|
|                                                              |                                                                                                                                              | Body condition                                        | Breeding success                                                    |                                                                |                                                                                                                                                                         |
| Southern Pied Babbler ( <i>Turdoides bicolor</i> )           | <b>Trade-off between foraging efficiency and heat dissipation behaviours such as panting and wing-drooping (8); reduced provisioning (9)</b> | Overnight mass loss versus diurnal mass gain (adults) | Nestling size and mass                                              | Daily $T_{\max} = 35.5\text{ }^{\circ}\text{C}$                | Diurnal mass gain insufficient to offset overnight loss, i.e., net 24-hr loss (adults); smaller and lighter nestlings at day 11                                         |
|                                                              |                                                                                                                                              |                                                       |                                                                     | Daily $T_{\max} = 38.5\text{ }^{\circ}\text{C}$                | Zero diurnal mass gain (adults)                                                                                                                                         |
| Southern Yellow-billed hornbill ( <i>Tockus leucomelas</i> ) | <b>Trade-off in breeding males between foraging efficiency and heat dissipation behaviours such as panting and shade-seeking (10)</b>        | Overnight mass loss versus diurnal mass gain)         | Shift in nest provisioning decisions                                | Daily $T_{\max} = 34.5\text{ }^{\circ}\text{C}$                | Males spend 50 % of time panting, strong trade-offs between foraging and thermoregulation become evident [Daily $T_{\max} = 37.9$ , zero diurnal mass gain adult males] |
|                                                              | <b>Effects of nest cavity thermal environment on female and nestling mass (10)</b>                                                           |                                                       | Nest abandonment, cannibalism of nestlings by female, fledging mass | Average nesting period $T_{\max} = 35\text{ }^{\circ}\text{C}$ | Probability of successful breeding < 50 %                                                                                                                               |
| Southern Fiscal ( <i>Lanius collaris</i> )                   | <b>Trade-off between foraging success and thermal properties of hunting</b>                                                                  |                                                       | Nestling growth rates                                               | Daily $T_{\max} = 33\text{ }^{\circ}\text{C}$                  | Reduced fledging mass                                                                                                                                                   |

**perches, resulting in reduced provisioning (11, 12)**

Daily  $T_{\max}$  =  
35 °C

Delayed fledging  
resulting in increased  
nest predation risk

Daily  $T_{\max}$  =  
37 °C

Reduced fledging tarsus  
length

---

Table S3. Mean summer daily maximum temperatures (“Summer”) and the mean maximum temperature of the hottest day per year for three regions in the southern African arid zone under past climate (1050 – 1850 CE), present climate (2000 – 2010 CE) and a high-risk future climate scenario (RCP 8.5, 2080 – 2090 CE).

| Region            | 1050 – 1850 |                  | 2000 – 2010 |                  | 2080 – 2090 |                  |
|-------------------|-------------|------------------|-------------|------------------|-------------|------------------|
|                   | Summer (°C) | Hottest day (°C) | Summer (°C) | Hottest day (°C) | Summer (°C) | Hottest day (°C) |
| Central Namibia   | 28.4        | 35.5             | 28.7        | 40.9             | 34.1        | 45.5             |
| Northern Botswana | 28.9        | 36.4             | 29.6        | 45.6             | 34.9        | 46.2             |
| Southern Kalahari | 28.6        | 35.6             | 29.7        | 40.9             | 35.4        | 45.6             |

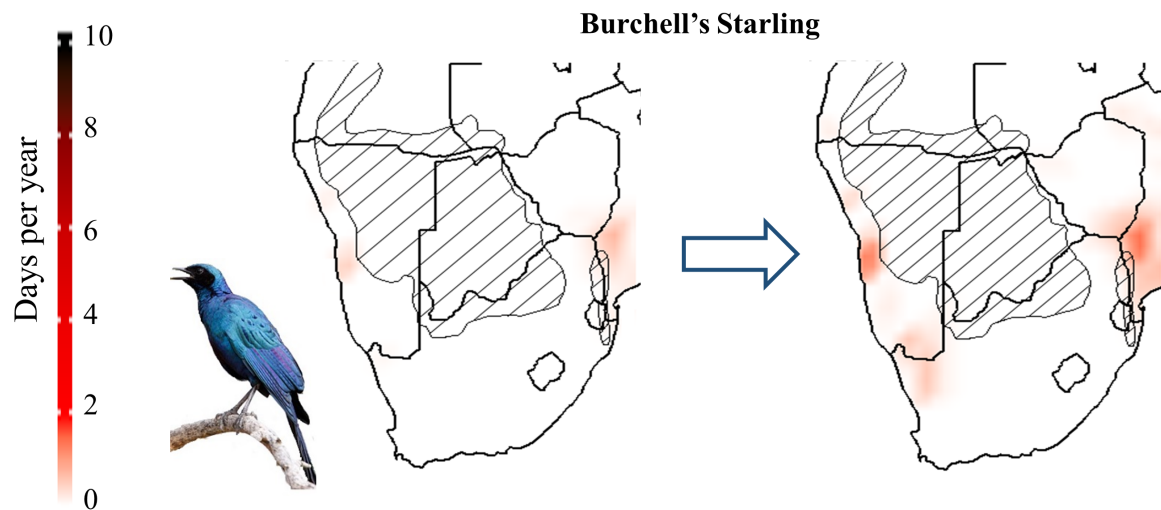

Figure S3. Average number of days per year with moderate dehydration risk (i.e., survival time of < 5 hours) across southern Africa for Burchell’s Starling under current (2000 – 2010) and a moderate risk future scenario (RCP 4.5; 2080 – 2090) (2080 – 2090). Species range indicated with cross-hatching.

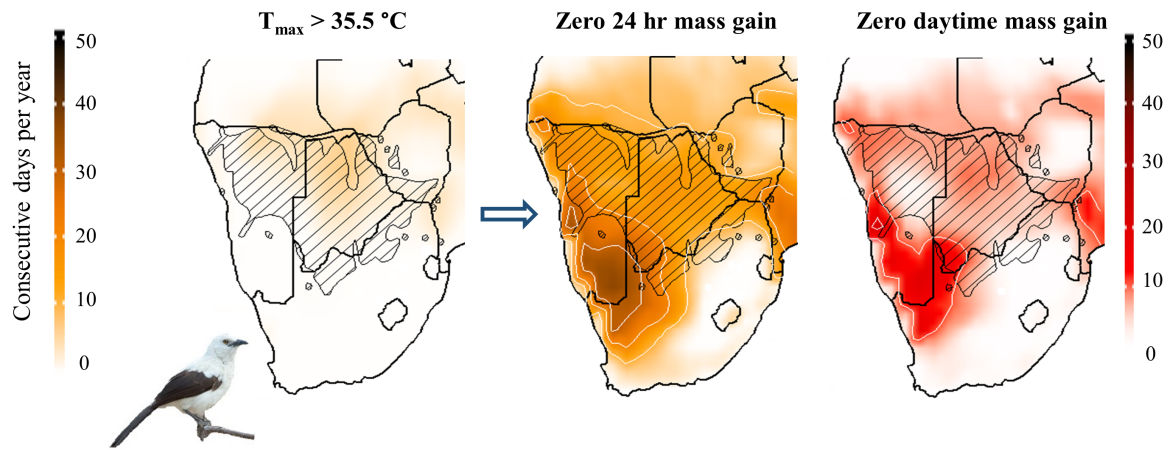

Figure S4. Average number of consecutive days per year where Southern Pied Babbblers are exposed to conditions of zero 24-hr body mass gain and zero daytime body mass gain (i.e.,  $\sim 4\%$  body mass loss per 24 hr) under current (2000 - 2010) and a moderate risk future scenario (RCP 4.5; 2080 – 2090). Species range indicated by cross-hatching.

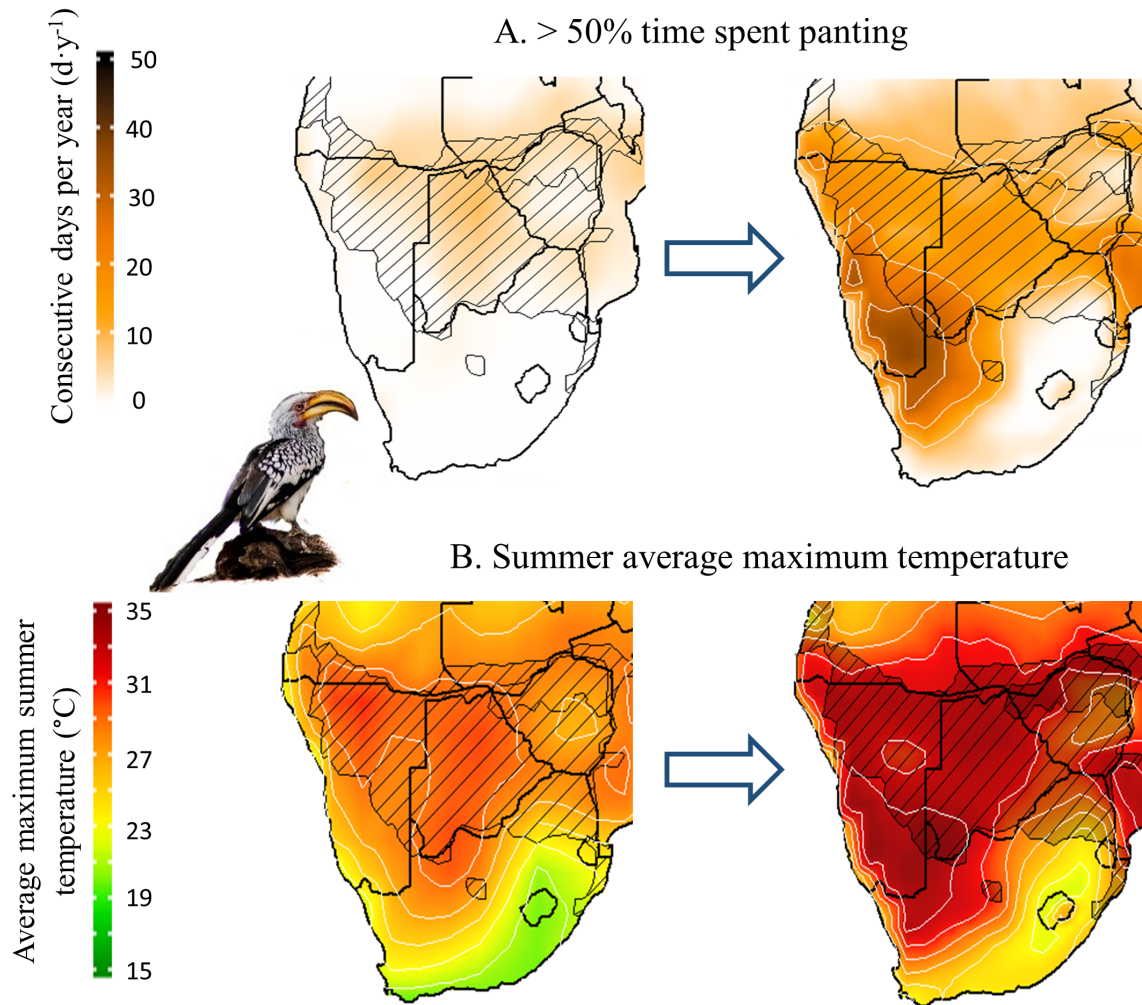

Figure S5. Average number of consecutive days pr year where Southern Yellow-billed Hornbills are exposed to conditions of chronic heat stress risk (Panel A:  $T_{max} = 34.5^{\circ}C$ , the threshold at which provisioning male hornbills spend 50 % of time panting) under current (2000 - 2010) and a moderate risk future scenario (RCP 4.5; 2080 – 2090). Panel B is the summer average maximum temperature under current and future conditions. Species range indicated with cross-hatching.



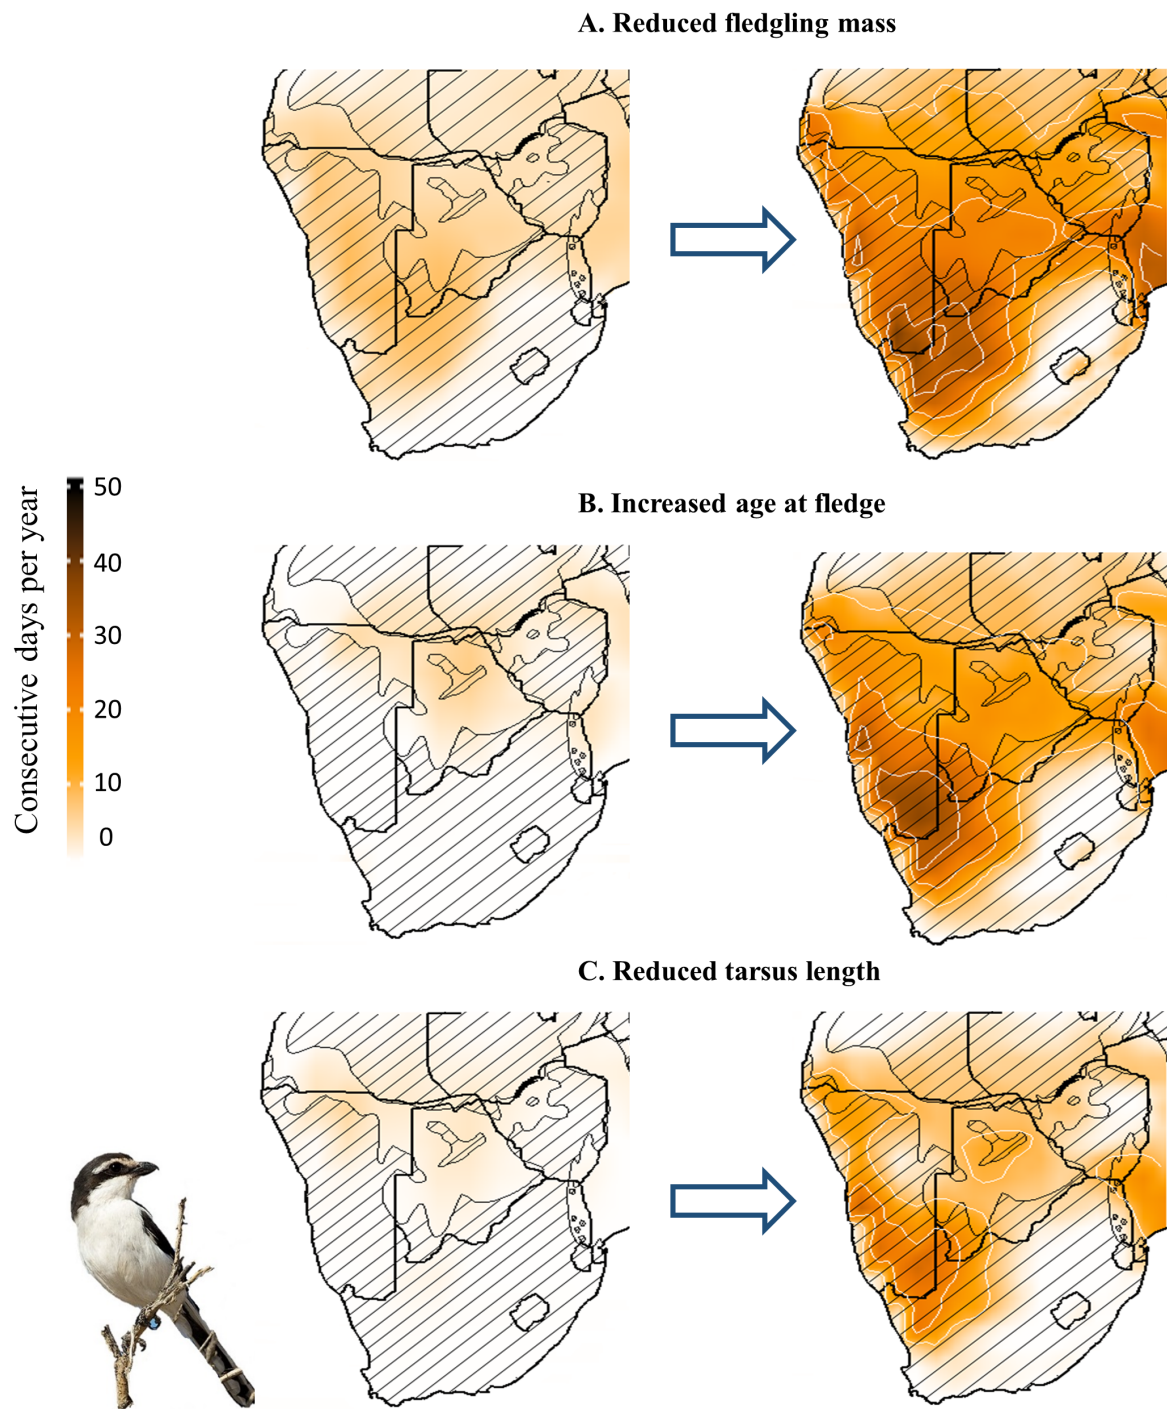

Figure S6. Average number of consecutive days per year where Southern Fiscals are exposed to conditions of chronic heat stress risk associated with reduced fledgling mass ( $T_{\max} = 33\text{ }^{\circ}\text{C}$ ), increased age at fledging ( $T_{\max} = 35\text{ }^{\circ}\text{C}$ ) and reduced fledgling tarsus length ( $T_{\max} = 37\text{ }^{\circ}\text{C}$ ) under current (2000 - 2010) and a high risk future scenarios (RCP 4.5; 2080 - 2090). Species range indicated with cross-hatching.

## References

1. Lovegrove BG (1993) *The living deserts of southern Africa*. (Fernwood Press, Vlaeberg).
2. van Wilgen NJ, Goodall V, Holness S, Chown SL, & McGeoch MA (2016) Rising temperatures and changing rainfall patterns in South Africa's national parks. *International Journal of Climatology* 36(2):706-721.
3. Whitfield MC, Smit B, McKechnie AE, & Wolf BO (2015) Avian thermoregulation in the heat: scaling of heat tolerance and evaporative cooling capacity in three southern African arid-zone passerines. *J Exp Biol* 218:1705-1714.
4. McKechnie AE, *et al.* (2016) Avian thermoregulation in the heat: evaporative cooling capacity in an archetypal desert specialist, Burchell's sandgrouse (*Pterocles burchelli*). *J Exp Biol* 219:2137-2144.
5. McKechnie AE, *et al.* (2016) Avian thermoregulation in the heat: efficient evaporative cooling allows for extreme heat tolerance in four southern Hemisphere columbids. *J Exp Biol* 219:2145-2155.
6. Smit B, *et al.* (2018) Avian thermoregulation in the heat: phylogenetic variation among avian orders in evaporative cooling capacity and heat tolerance. *J Exp Biol* 221(6):jeb174870.
7. O'Connor RS, Wolf BO, Brigham RM, & McKechnie AE (2017) Avian thermoregulation in the heat: efficient evaporative cooling in two southern African nightjars. *J Comp Physiol B* 187(3):477-491.
8. du Plessis KL, Martin RO, Hockey PAR, Cunningham SJ, & Ridley AR (2012) The costs of keeping cool in a warming world: implications of high temperatures for foraging, thermoregulation and body condition of an arid-zone bird. *Global Change Biology* 18:3063-3070.
9. Wiley EM & Ridley AR (2016) The effects of temperature on offspring provisioning in a cooperative breeder. *Animal behaviour* 117:187-195.
10. van de Ven TMFN (2017) Implications of climate change on the reproductive success of the Southern Yellow-billed Hornbill *Tockus leucomelas*. PhD (University of Cape Town).
11. Cunningham SJ, Martin RO, & Hockey PA (2015) Can behaviour buffer the impacts of climate change on an arid-zone bird? *Ostrich* 86(1-2):119-126.
12. Cunningham SJ, Martin RO, Hojem CL, & Hockey PAR (2013) Temperatures in excess of critical thresholds threaten nestling growth and survival in a rapidly-warming arid savanna: a study of common fiscals. *PLoS One* 8(9):e74613.
